# Supplementary material for: Tripartite suppression of fission yeast TORC1 signaling by the GATOR1-Sea3 complex, the TSC complex, and Gcn2 kinase
Source: eLife. 2021 Feb 3;10:e60969. doi: 10.7554/eLife.60969 (PMC7857730; doi:10.7554/eLife.60969)
Supplement: Figure 6—figure supplement 3—source data 1. [file elife-60969-fig6-figsupp3-data1.xlsx]

## Sheet: Sheet1
																						Summary
																						Mating efficiency (Em)
	Strain		Replicate 1						Replicate 2						Replicate 3							Strain		Em (%)					T-test (compared with wild-type)
			Z	H	A	S	Em (%)	Es (%)	Z	H	A	S	Em (%)	Es (%)	Z	H	A	S	Em (%)	Es (%)				Replicate 1	Replicate 2	Replicate 3	Mean	SD	p-value
	wild-type	CA6425	25	45	175	0	89.8876	78.6517	12	41	128	0	87.2274	79.7508	9	24	45	0	81.8182	68.1818		wild-type	CA6425	89.8876	87.2274	81.8182	86.3111	4.11203
	iml1∆	CA10128	54	137	12	0	49.0706	8.92193	59	189	14	0	43.5821	8.35821	57	211	17	0	41.2256	9.47075		iml1∆	CA10128	49.0706	43.5821	41.2256	44.6261	4.02536	0.000116083	p < 0.01	*
	tsc2∆	CA10951	23	76	161	0	82.8829	72.5225	36	45	142	0	88.7781	70.8229	39	58	108	0	83.5227	61.3636		tsc2∆	CA10951	82.8829	88.7781	83.5227	85.0612	3.23473	0.350131	p > 0.01
	gcn2∆	TFSP4343	4	40	154	0	88.764	86.5169	13	44	143	0	87.6404	80.3371	9	50	161	0	87.1795	82.5641		gcn2∆	TFSP4343	88.764	87.6404	87.1795	87.8613	0.815044	0.278341	p > 0.01
	iml1∆ gcn2∆	TFSP4317	0	203	0	0	0	0	0	227	0	0	0	0	0	215	0	0	0	0		iml1∆ gcn2∆	TFSP4317	0	0	0	0	0	1.70864e-06	p < 0.01	*
	iml1∆ tsc2∆	TFSP4331	0	218	0	0	0	0	0	236	0	0	0	0	0	209	0	0	0	0		iml1∆ tsc2∆	TFSP4331	0	0	0	0	0	1.70864e-06	p < 0.01	*
	gcn2∆ tsc2∆	TFSP4319	56	246	4	0	32.7869	2.18579	44	190	5	0	34.0278	3.47222	56	200	3	0	37.1069	1.88679		gcn2∆ tsc2∆	TFSP4319	32.7869	34.0278	37.1069	34.6405	2.22425	2.19377e-05	p < 0.01	*
	iml1∆ gcn2∆ tsc2∆	TFSP4347	0	217	0	0	0	0	0	216	0	0	0	0	0	243	0	0	0	0		iml1∆ gcn2∆ tsc2∆	TFSP4347	0	0	0	0	0	1.70864e-06	p < 0.01	*
	Zygote	Z																				Sporulation efficiency (Es)
	Haploid	H																				Strain		Es (%)					T-test (compared with wild-type)
	Asci	A																						Replicate 1	Replicate 2	Replicate 3	Mean	SD	p-value
	Free spore	S																				wild-type	CA6425	78.6517	79.7508	68.1818	75.5281	6.38575
	Mating Efficiency	Em																				iml1∆	CA10128	8.92193	8.35821	9.47075	8.91696	0.556288	2.80041e-05	p < 0.01	*
	Sporulation Efficiency	Es																				tsc2∆	CA10951	72.5225	70.8229	61.3636	68.2364	6.01232	0.111647	p > 0.01
																						gcn2∆	TFSP4343	86.5169	80.3371	82.5641	83.1393	3.12979	0.0686942	p > 0.01
																						iml1∆ gcn2∆	TFSP4317	0	0	0	0	0	1.67658e-05	p < 0.01	*
																						iml1∆ tsc2∆	TFSP4331	0	0	0	0	0	1.67658e-05	p < 0.01	*
																						gcn2∆ tsc2∆	TFSP4319	2.18579	3.47222	1.88679	2.51494	0.842406	1.98442e-05	p < 0.01	*
																						iml1∆ gcn2∆ tsc2∆	TFSP4347	0	0	0	0	0	1.67658e-05	p < 0.01	*
